# Supplementary material for: Strategic cation exchange induced 2D nickel sulphide nanoplates with enhanced oxygen evolution reaction performance
Source: Royal Society of Chemistry journal article supplement (doi:10.1039/d4ta05191b), 2024-01-01
Supplement: d4ta05191b1.pdf [file d4ta05191b1.pdf]

## Electronic Supporting Information

### Strategic Cation Exchange Induced 2D Nickel Sulphide Nanoplates with Enhanced Oxygen Evolution Reaction Performance

*Jiayi Chen,<sup>a</sup> Xiaomin Xu,<sup>b</sup> Rundong Mao,<sup>a</sup> Cuifang Wang,<sup>b</sup> Hsien-Yi Hsu,<sup>c,d</sup> Zongyou Yin,<sup>e</sup> Mark A. Buntine,<sup>a</sup> Alexandra Suvorova,<sup>f</sup> Martin Saunders,<sup>f</sup> Zongping Shao,<sup>\*b</sup> and Guohua Jia<sup>\*a</sup>*

<sup>a</sup> School of Molecular and Life Sciences, Curtin University, Bentley, WA 6102, Australia. E-mail: [guohua.jia@curtin.edu.au](mailto:guohua.jia@curtin.edu.au)

<sup>b</sup> WA School of Mines: Minerals, Energy and Chemical Engineering (WASM-MECE), Curtin University, Perth, WA, 6102 Australia. E-mail: [zongping.shao@curtin.edu.au](mailto:zongping.shao@curtin.edu.au)

<sup>c</sup> School of Energy and Environment, City University of Hong Kong, Kowloon Tong, Hong Kong SAR, P. R. China

<sup>d</sup> Shenzhen Research Institute of City University of Hong Kong, Shenzhen, 518057, P. R. China

<sup>e</sup> Research School of Chemistry, Australian National University, Canberra, ACT 2600, Australia

<sup>f</sup> Centre for Microscopy Characterization and Analysis (CMCA), The University of Western Australia, Perth, WA 6009, Australia

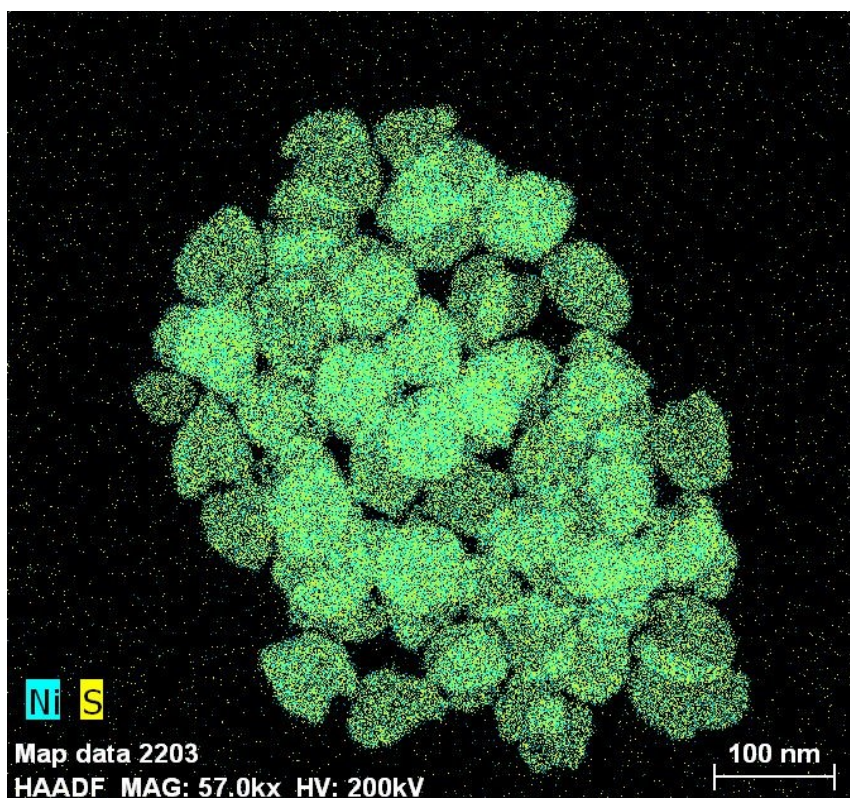

Fig. S1 (A) STEM-EDS elemental mapping of Ni and S overlay mapping result of Ni<sub>x</sub>S nanoplates,

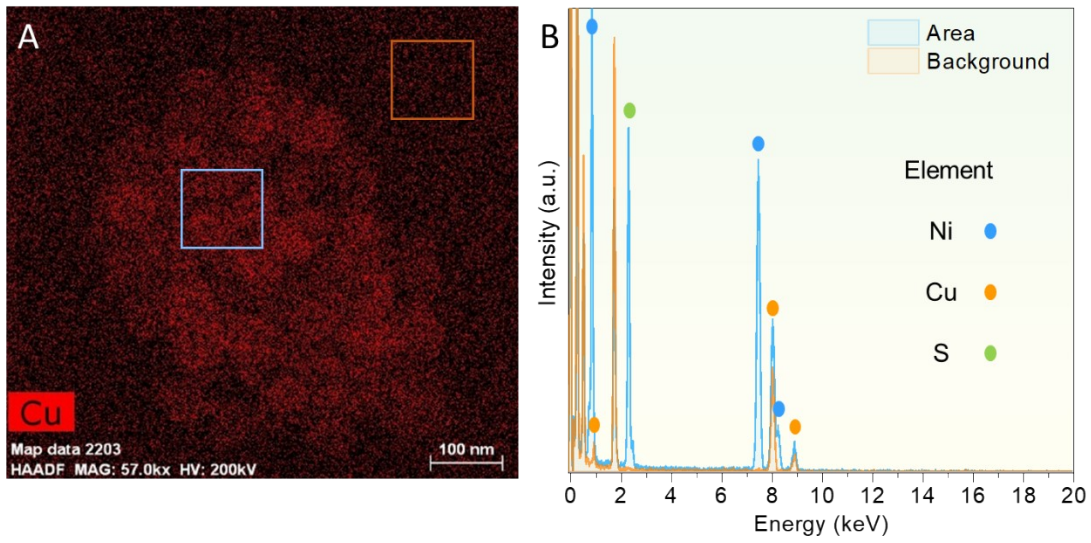

Fig. S2 (A) STEM-EDS elemental mapping of Cu of Ni<sub>x</sub>S nanoplates, (B) EDS spectrum of sample area (in blue) and background area (in orange). Peaks of Ni, Cu and S are marked in blue, orange and green dots, respectively.

---

| <b>Formula</b>    | <b>Ni (mg/kg)</b> | <b>Cu (mg/kg)</b> | <b>Ni at%</b> | <b>Cu at%</b> |
|-------------------|-------------------|-------------------|---------------|---------------|
| Ni <sub>x</sub> S | 610000            | 1500              | 0.997733925   | 0.002266075   |

---

Table S1 ICP-AES results of Ni and Cu contents and calculated Ni at% and Cu at% in Ni<sub>x</sub>S nanoplates.

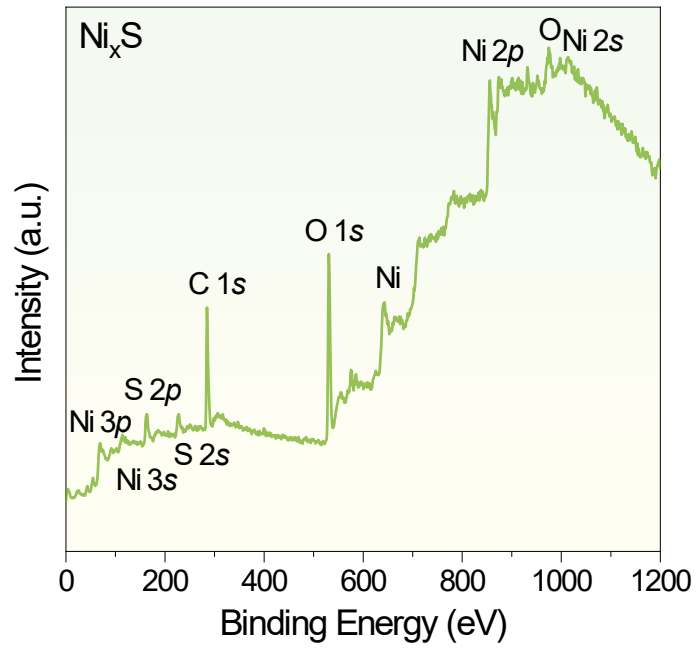

Fig. S3 XPS survey spectra of  $\text{Ni}_x\text{S}$  nanoplates.

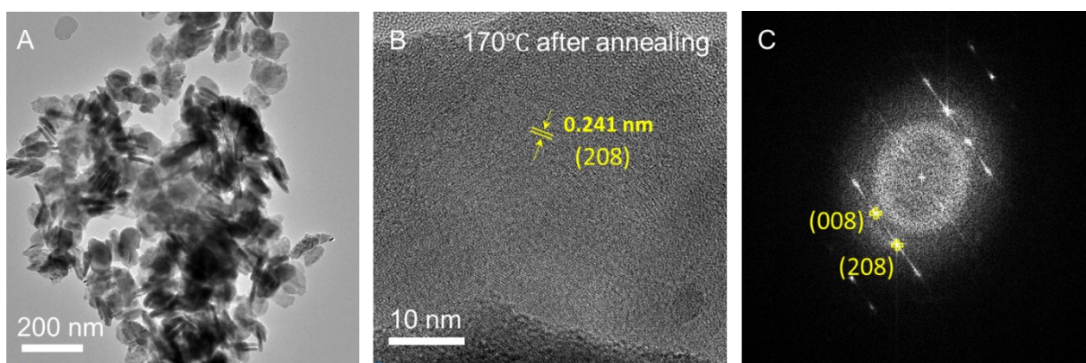

Fig. S4 (A) TEM, (B) HRTEM and (C) corresponding FFT pattern of calcined  $\text{Ni}_x\text{S}$  nanoplates.

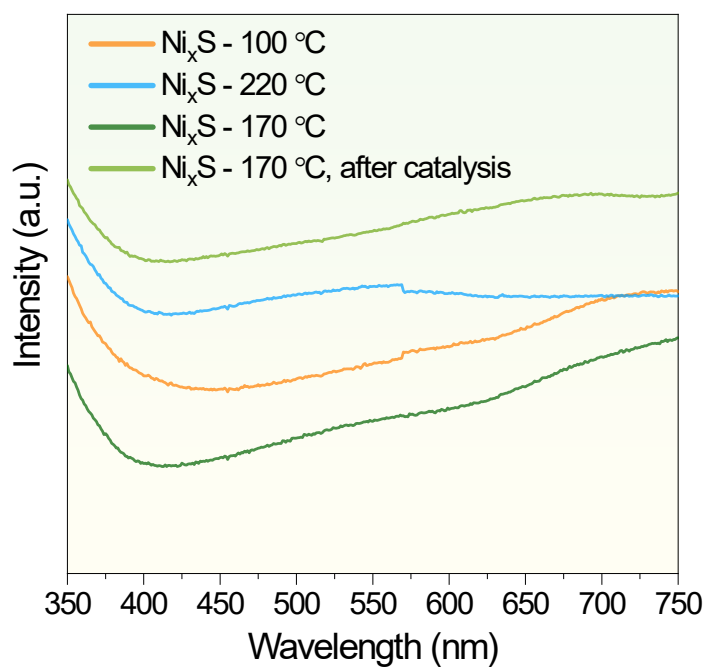

Fig. S5 UV-Vis spectra of annealed Ni<sub>x</sub>S nanoplates synthesised at 100 °C, 170 °C and 220 °C, and Ni<sub>x</sub>S nanoplates synthesised at 170 °C after electrochemical measurement.

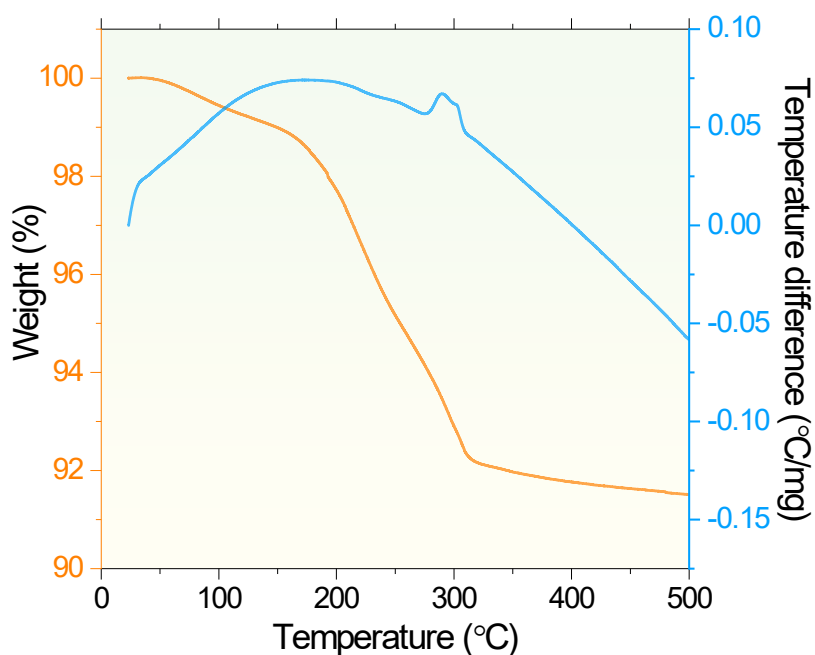

Fig. S6 Differential thermal analysis (DTA) and thermal gravimetric analysis (TGA) of  $\text{Ni}_x\text{S}$  nanoplates under nitrogen. The mass loss corresponds to the ligand detachment, and the remaining mass is the mass of the  $\text{Ni}_x\text{S}$  nanoplates.

8 mg of  $\text{Ni}_x\text{S}$  nanoplates synthesised at 170 °C was weighed into a 110  $\mu\text{L}$  platinum crucible with a matched empty crucible as a reference. The sample was heated from ambient to 600 °C at 5 °C per minute in a nitrogen atmosphere flowing at 100 ml per minute. The temperature scale of the instrument was calibrated using the melting points of 99.999% indium (156.5985 °C), 99.99+% tin (231.93 °C), 99.99+% zinc (419.53 °C), 99.99% silver (961.78 °C), and 99.999% gold (1064.18 °C). The balance was calibrated using alumina mass standards provided by the instrument manufacturer. The heat flow between the pans was calibrated using a sapphire disk provided by the instrument manufacturer. The cell constant was fine-tuned using the heat of fusion of zinc (113 J/g).
